# Supplementary material
Source: Springer Nature journal article supplement (https://www.springermedizin.de/resource/supplementary/12943_2013_1301_MOESM6_ESM.pdf/9552668)
Supplement: MOESM6 [file 9552668]

Migration

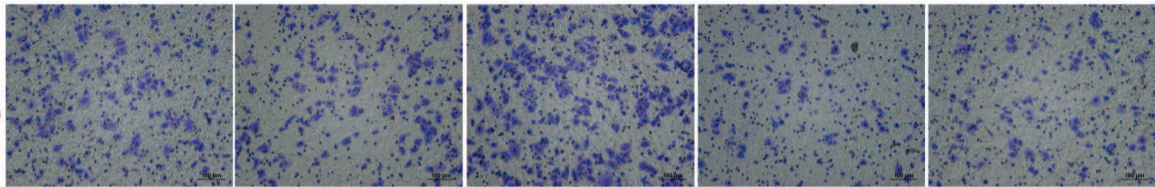

Invasion

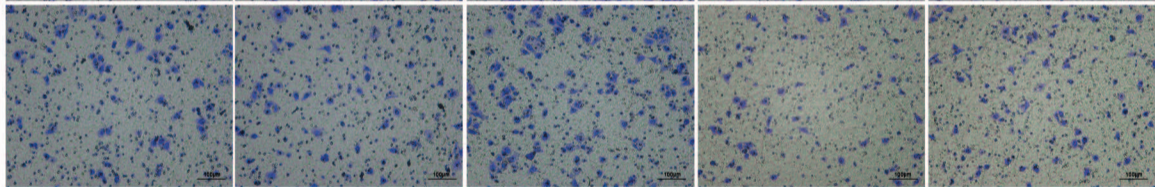

SGC7901 +  
vector -  
MELK -  
FAK-I -

+  
+  
-  
-

+  
-  
+  
-

+  
+  
-  
+

+  
-  
+  
+
